# Supplementary material for: Notch1 Pathway Activity Determines the Regulatory Role of Cancer-Associated Fibroblasts in Melanoma Growth and Invasion
Source: PubMed Central journal article supplement (PMC4643021; doi:10.1371/journal.pone.0142815), 2015-11-12

**S1 Fig. A.** Representative appearance pictures of GOF<sup>Notch1</sup> and GOF<sup>Ctrl</sup>. Skin tissue histology appears normal as examined by H&E at week 6. **B.** Elevated expression of Hey1 in skin fibroblasts of GOF<sup>Notch1</sup> mice compared with GOF<sup>Ctrl</sup> mice. Arrowheads point to nuclear-localized Hey1 in fibroblasts. Antibody recognizes Hey-1 was purchased from GeneTex (GTX42614).

Suppl. Figure 1

A

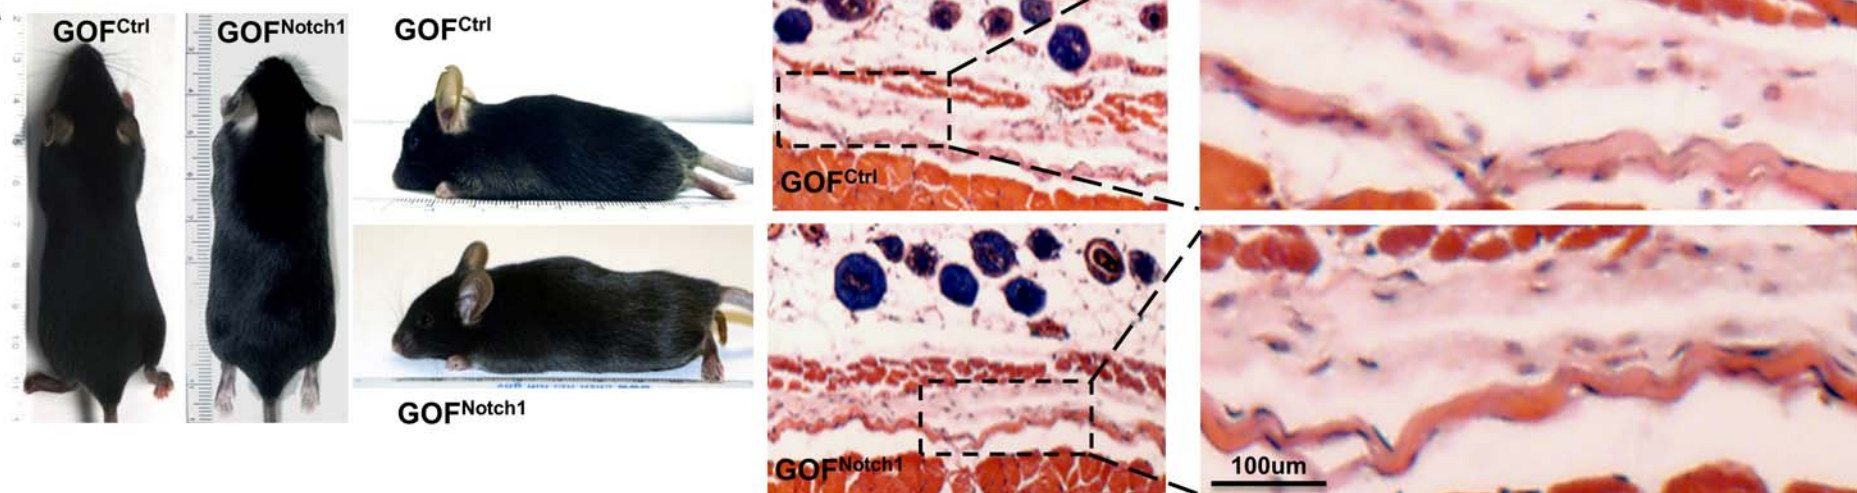

B

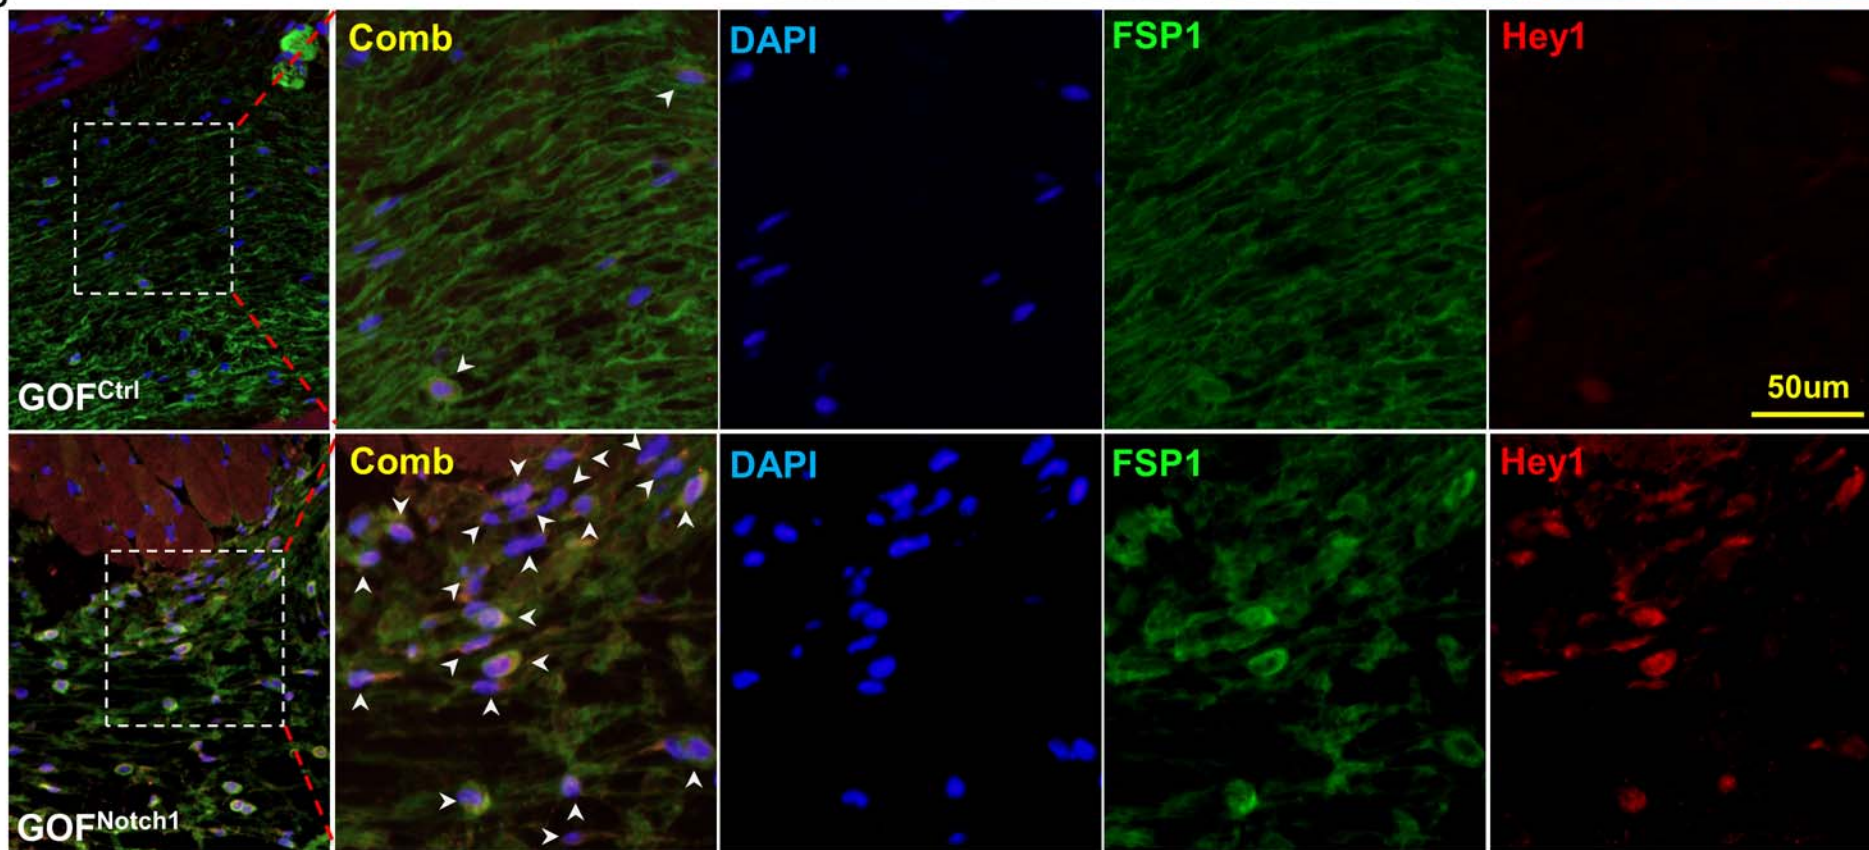

Supplement: pone.0142815.s001.pdf [file pone.0142815.s001.pdf]
