# Supplementary material for: Notch1 Pathway Activity Determines the Regulatory Role of Cancer-Associated Fibroblasts in Melanoma Growth and Invasion
Source: PubMed Central journal article supplement (PMC4643021; doi:10.1371/journal.pone.0142815), 2015-11-12

**S2 Fig. A.** Representative appearance pictures of LOF<sup>Notch1</sup> and LOF<sup>Ctrl</sup>. Skin tissue histology appears normal as examined by H&E at week 6. **B.** Hes1 expression is undetectable in fibroblasts located at capsule of melanoma in LOF<sup>Notch1</sup> mice but slightly detectable at capsule of melanoma LOF<sup>Ctrl</sup> mice. Arrowheads point to nuclear-localized Hes1 in fibroblasts. Antibody recognizes Hes1 was purchased from Abcam (ab71559).

Suppl. Figure 2

A

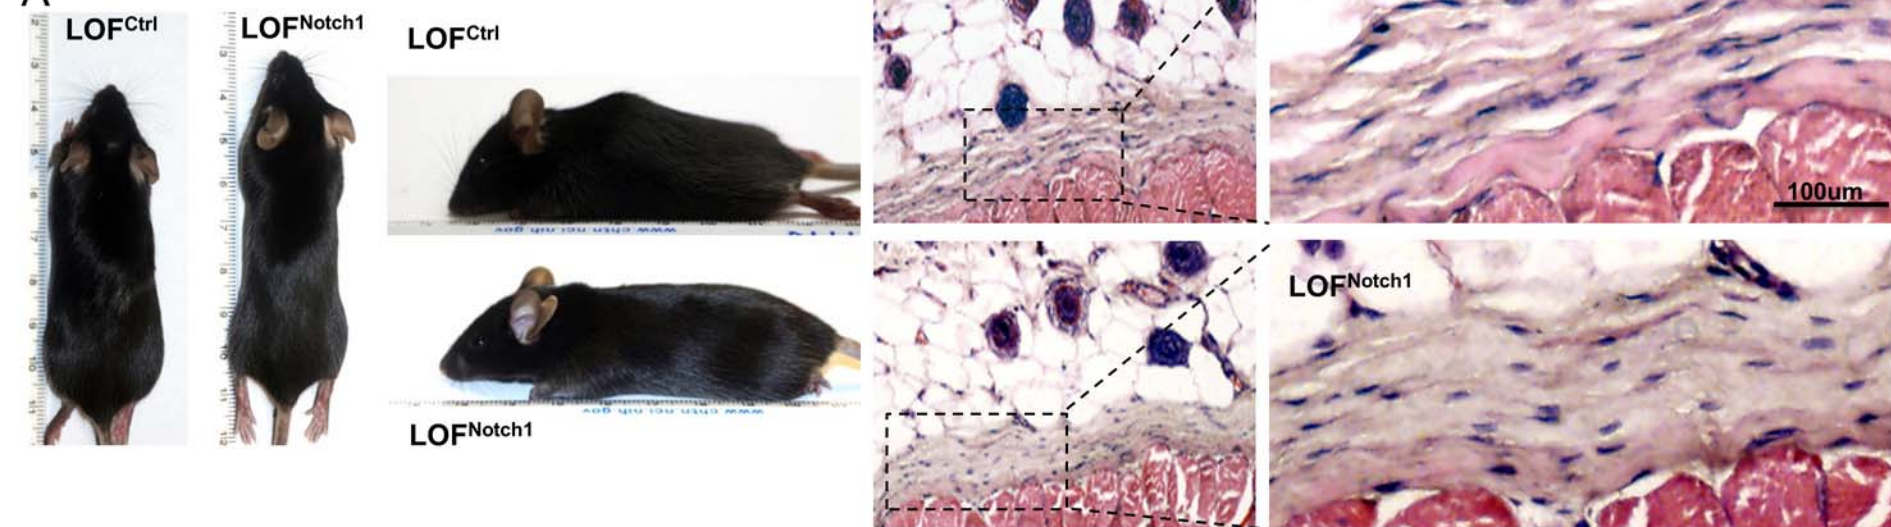

B

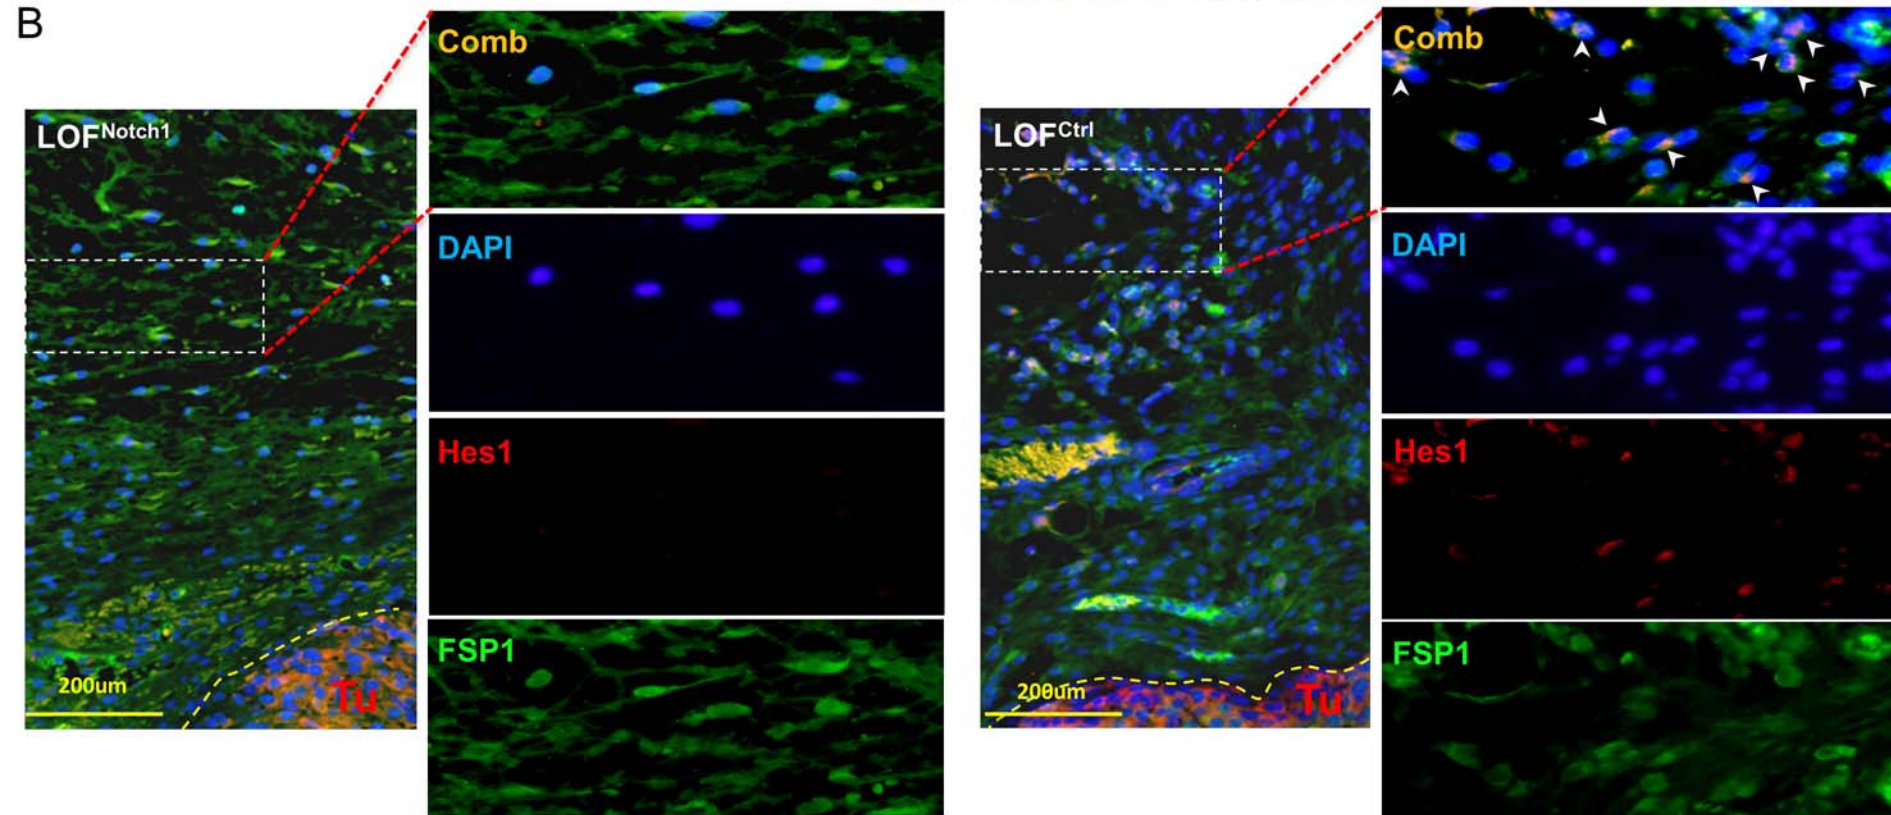

Supplement: pone.0142815.s002.pdf [file pone.0142815.s002.pdf]
